# Supplementary material for: Runup, Inundation, and Sediment Characteristics of 22 December 2018 Indonesia Sunda Strait Tsunami
Source: Copernicus journal article supplement (doi:10.5194/nhess-2019-325), 2019-10-16

## SUPPLEMENT

“Runup, Inundation, and Sediment Characteristics of December 22 2018 Indonesia Sunda Strait Tsunami”  
Wahyu Widiyanto et al.

Sand samples

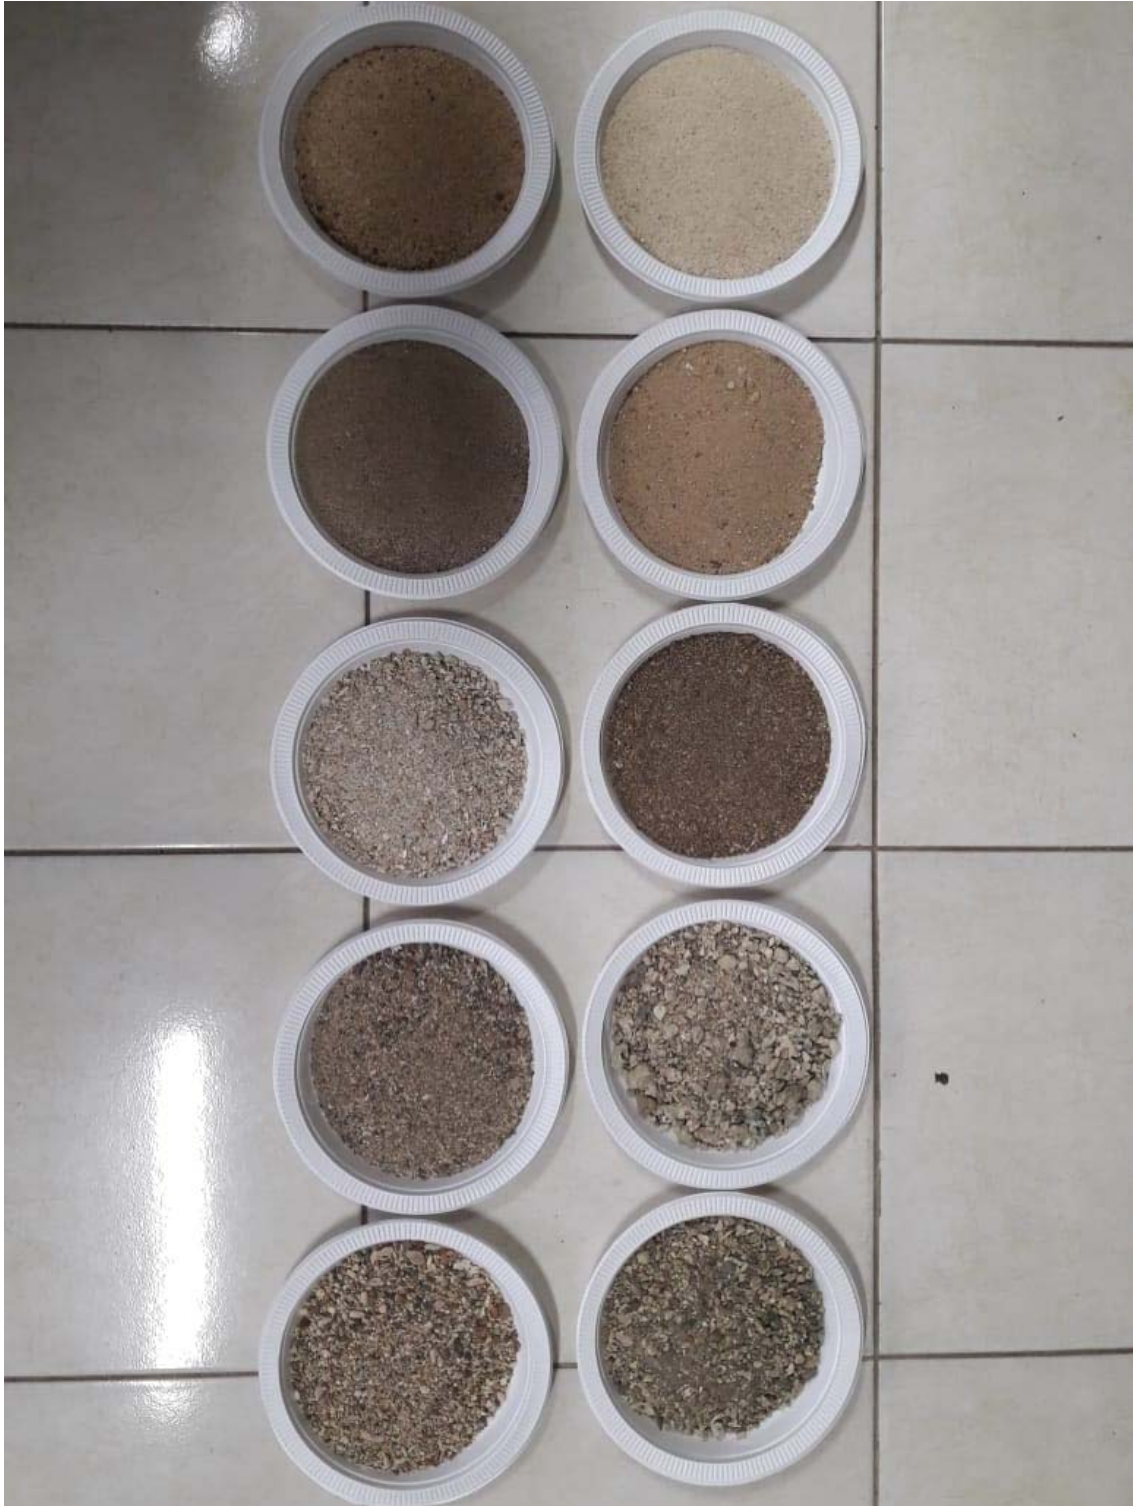

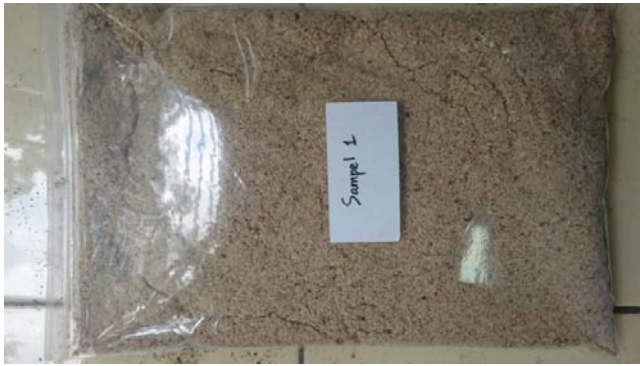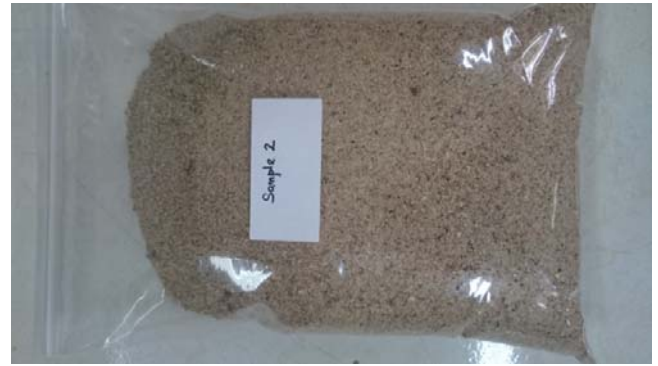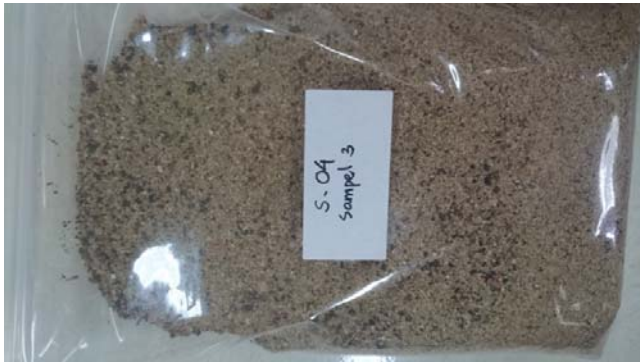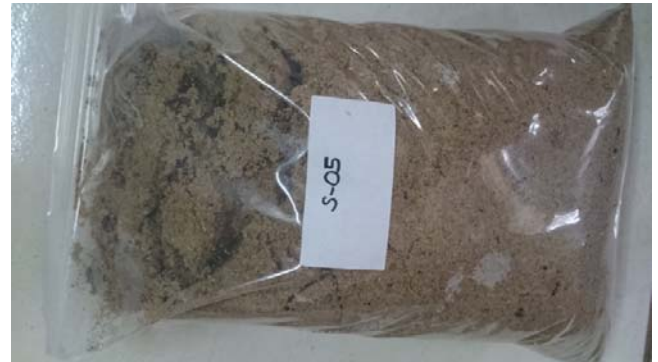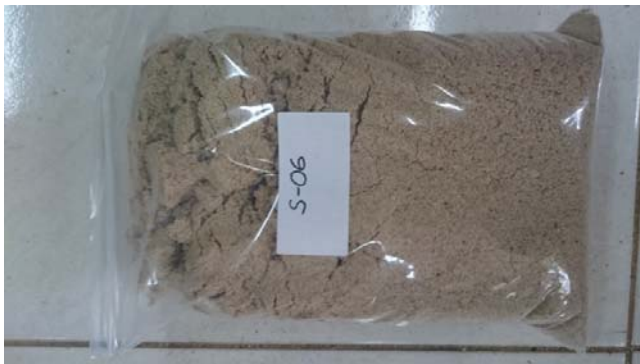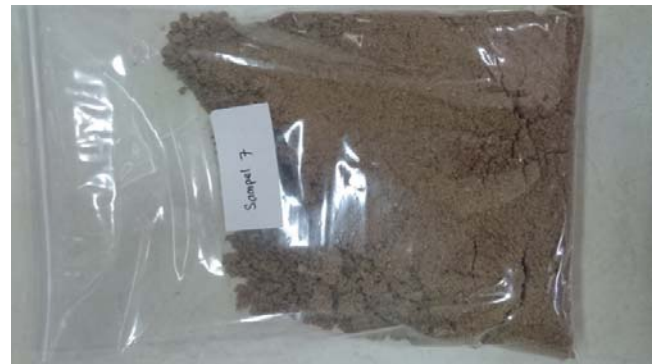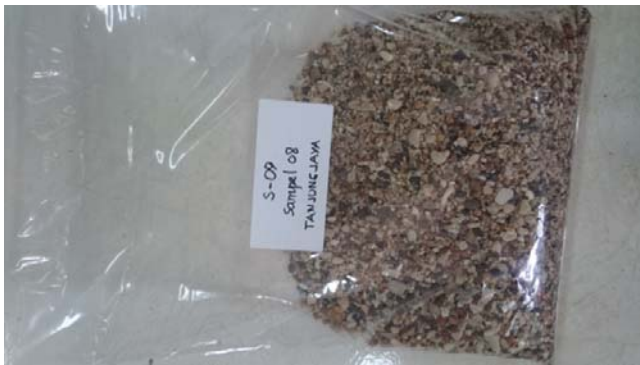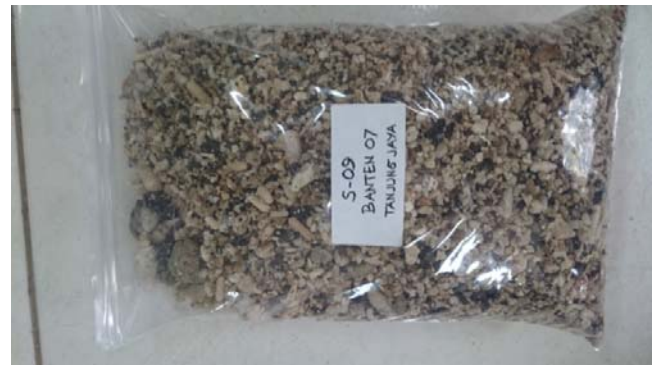



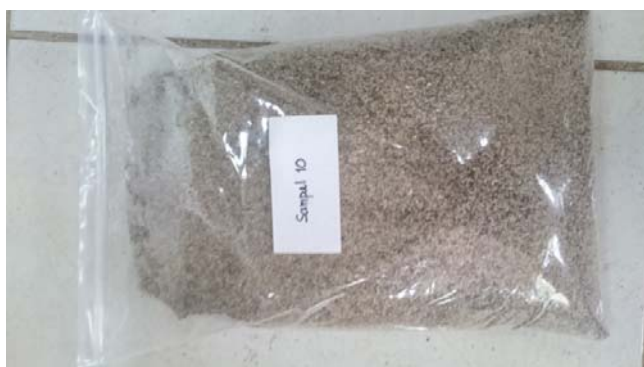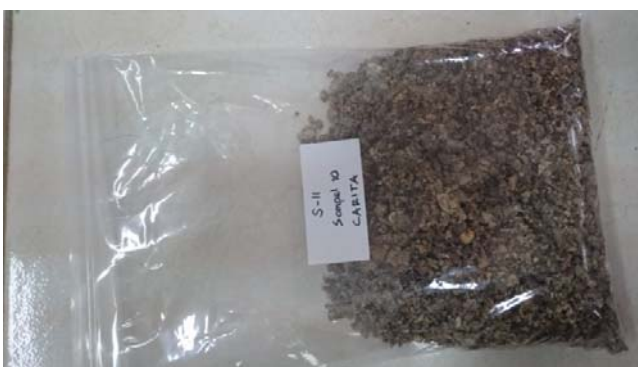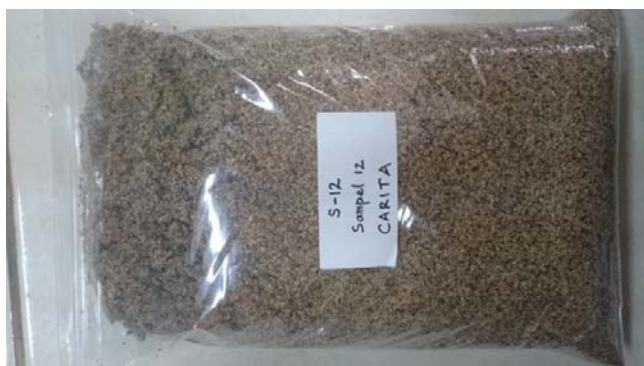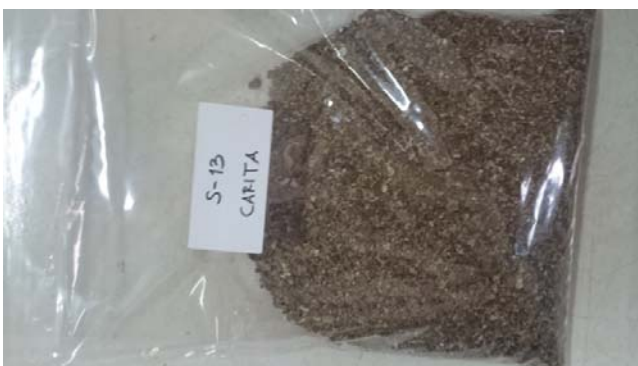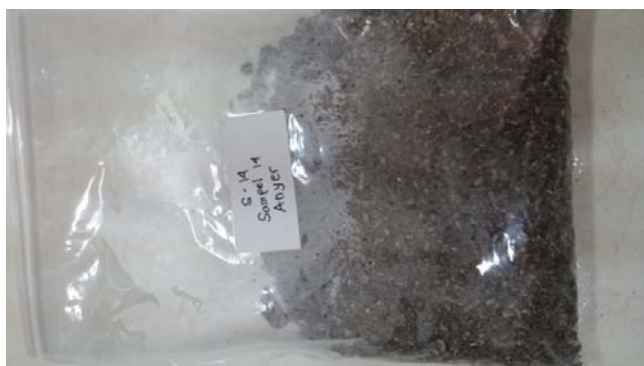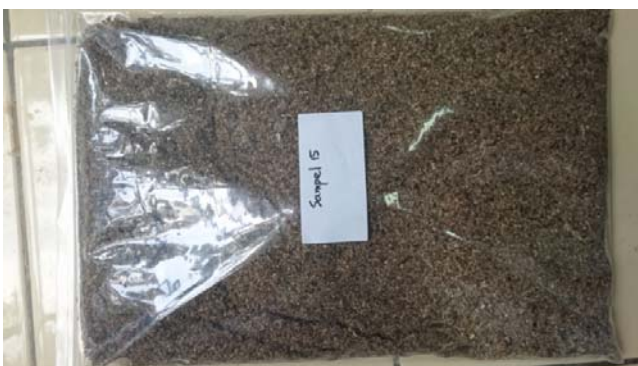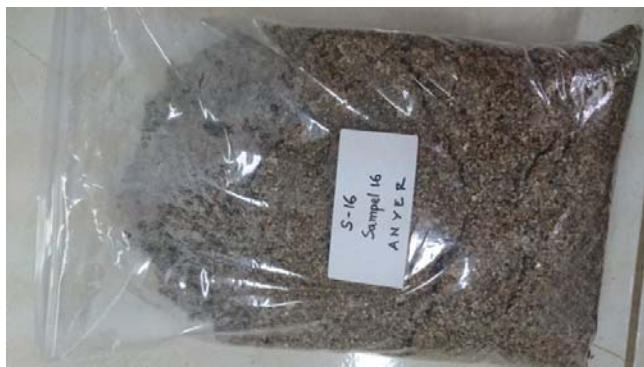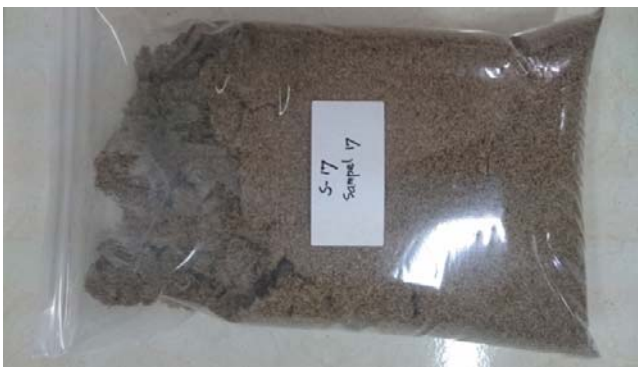

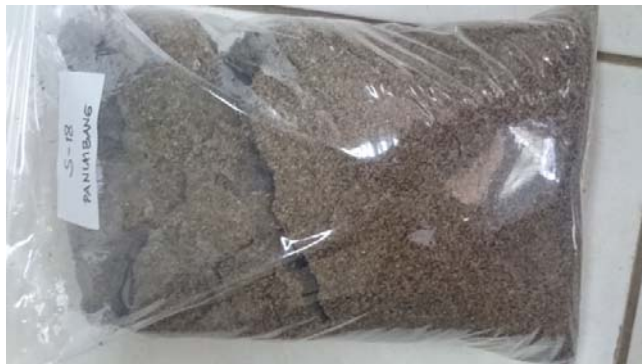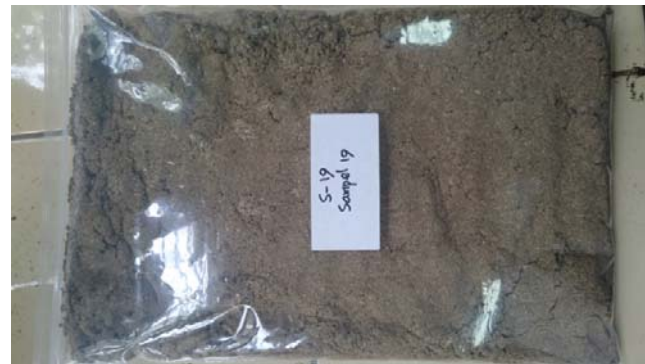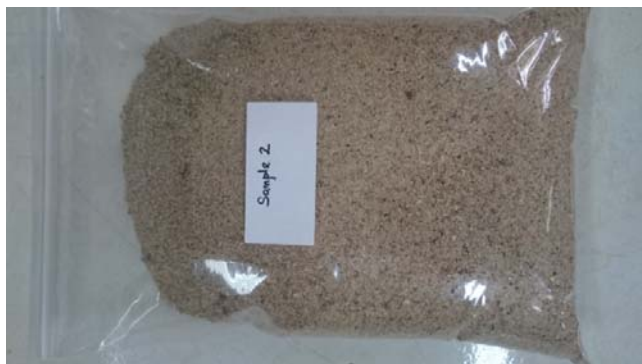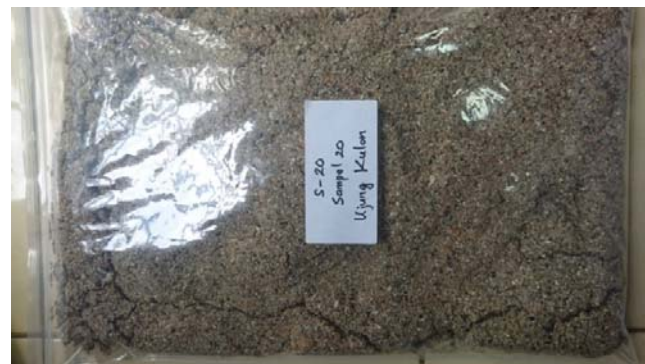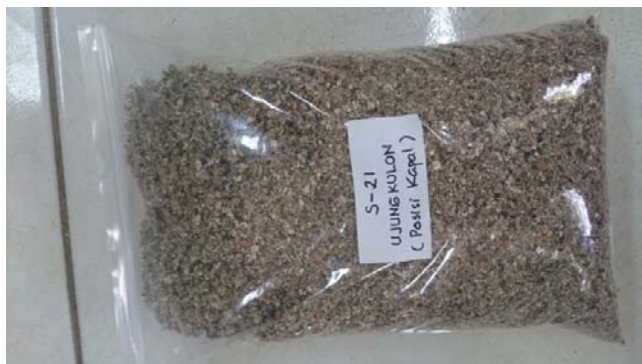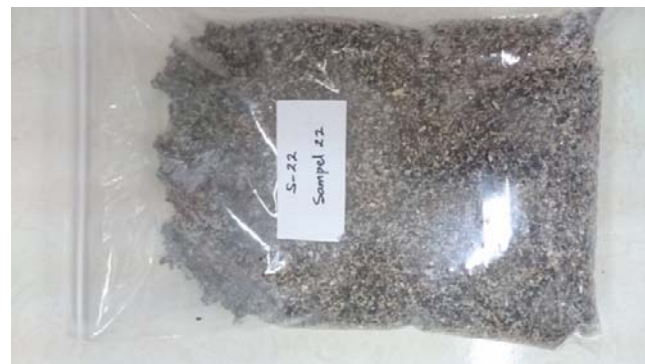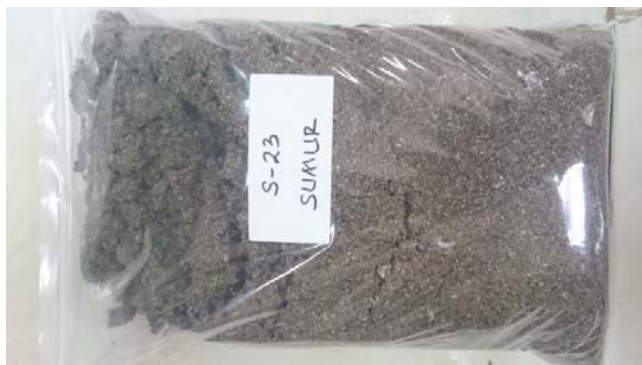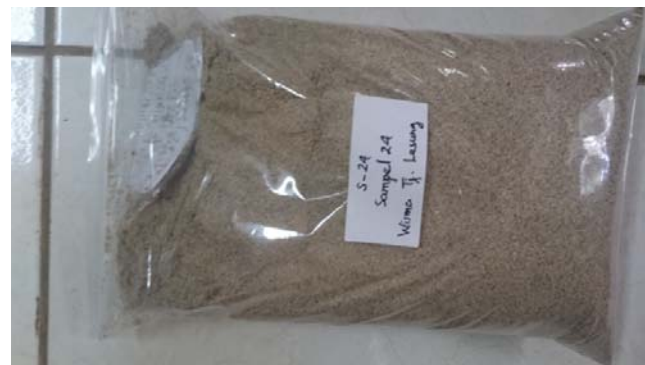



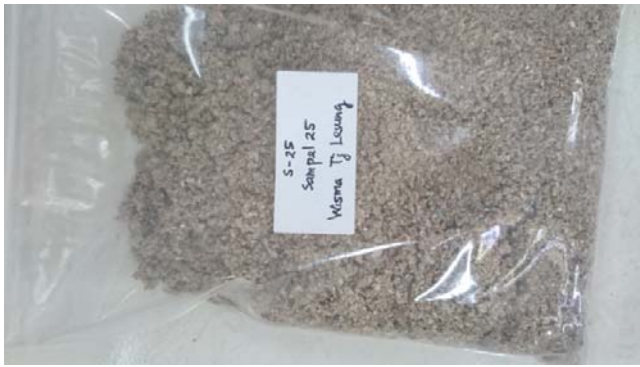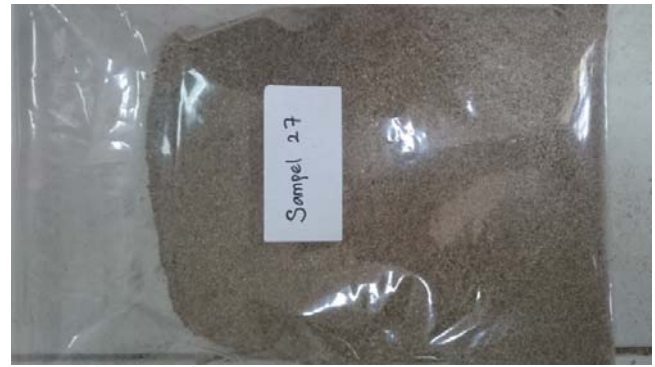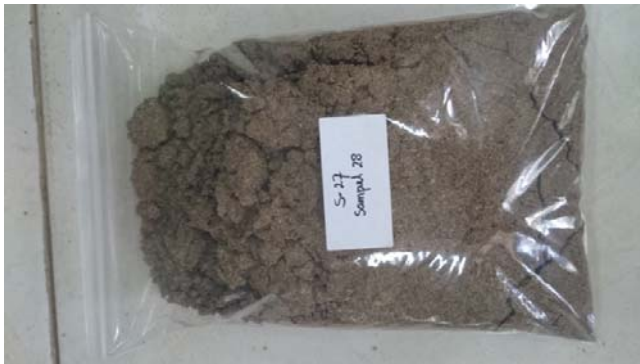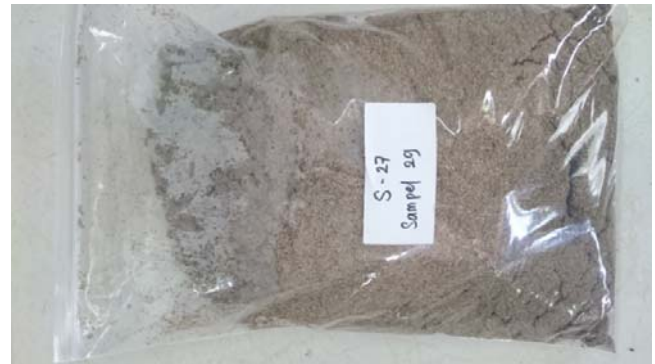

## Boulder movement

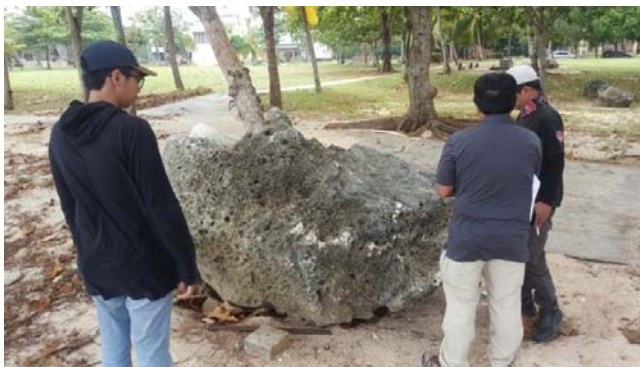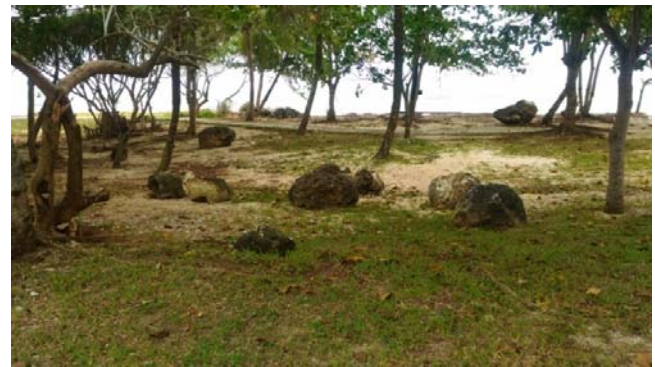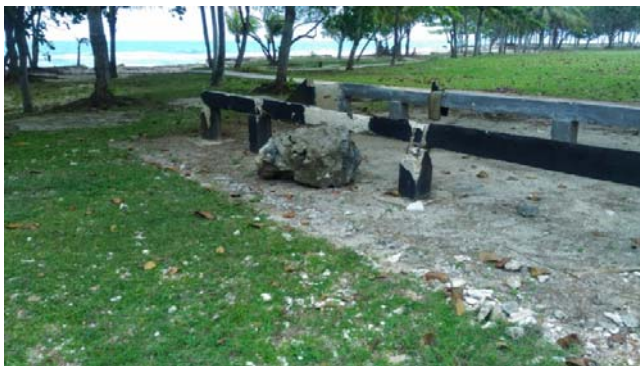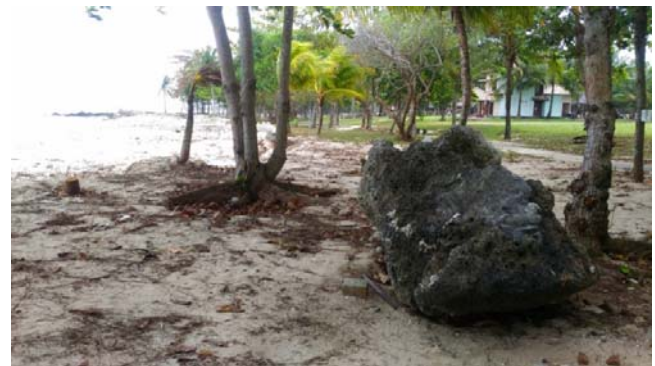



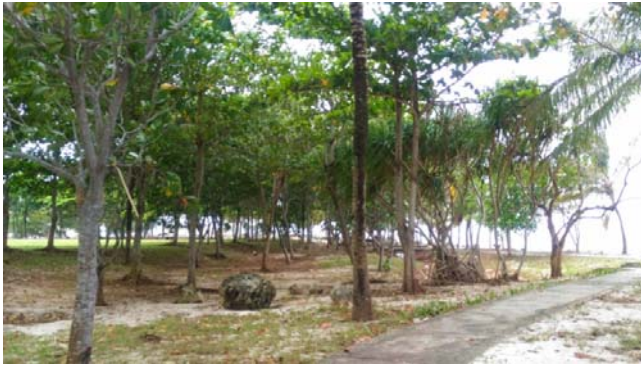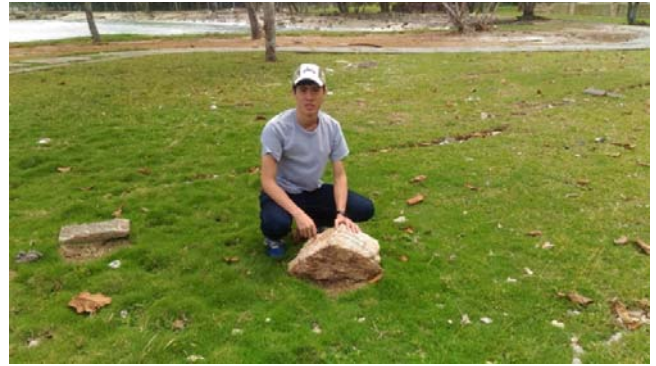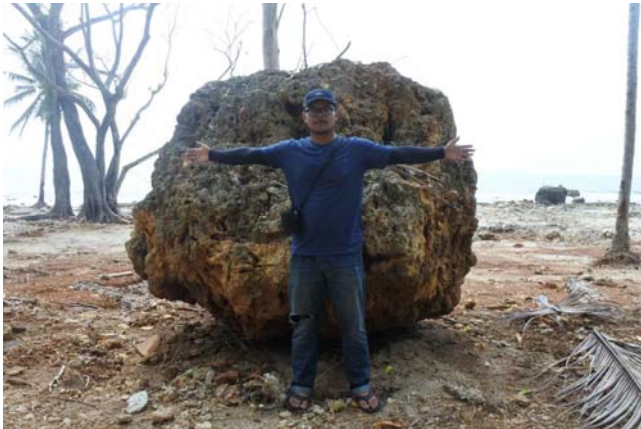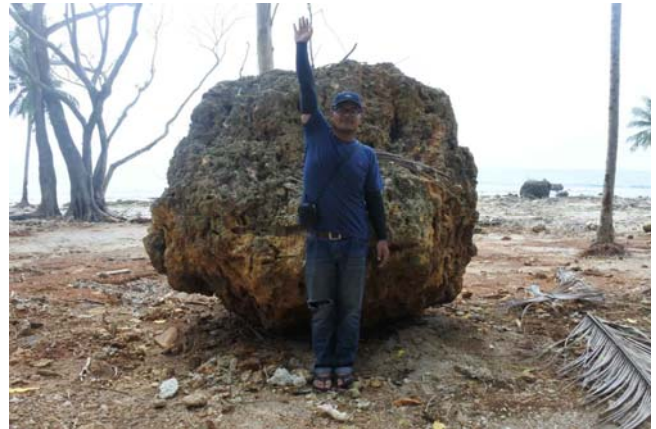

## Damages

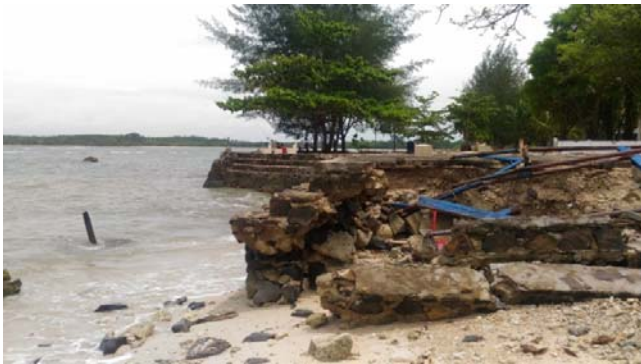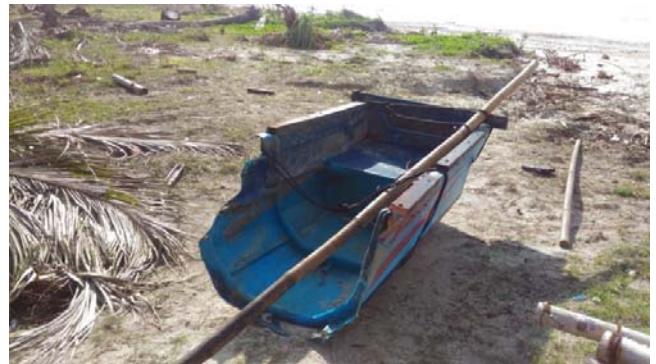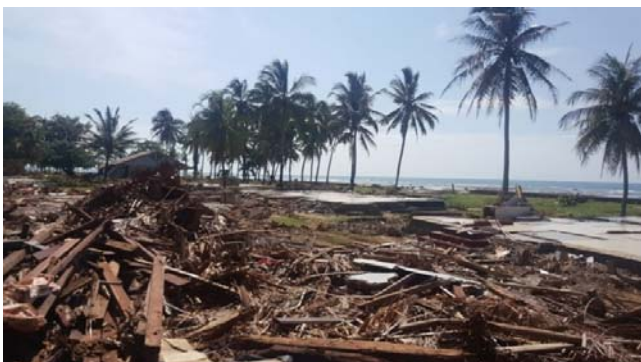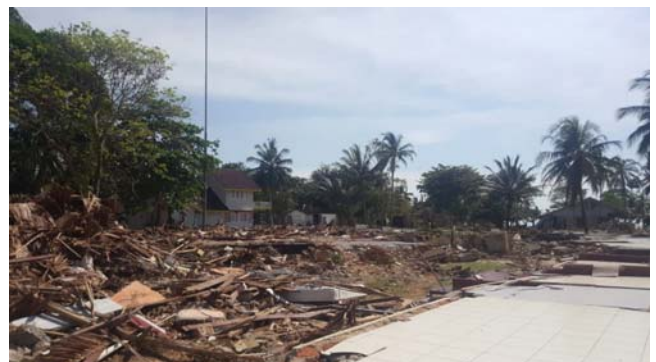



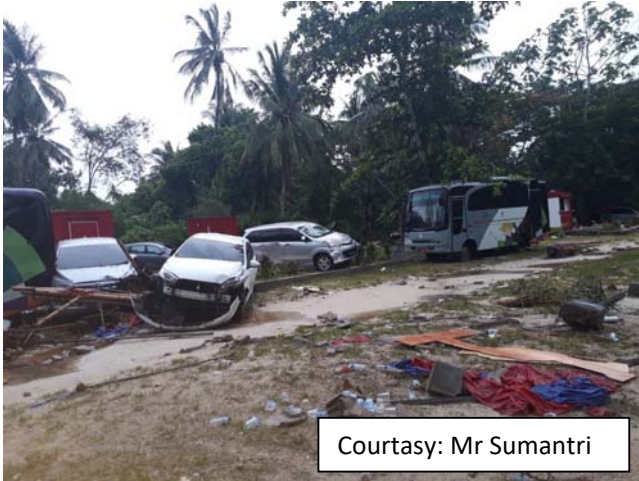

Courtesy: Mr Sumantri

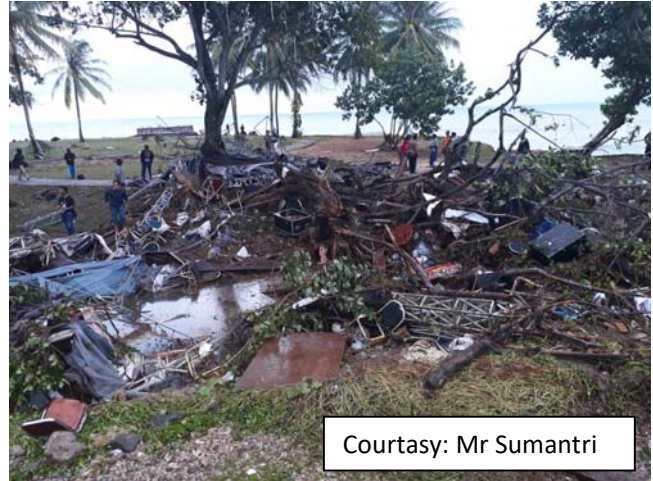

Courtesy: Mr Sumantri

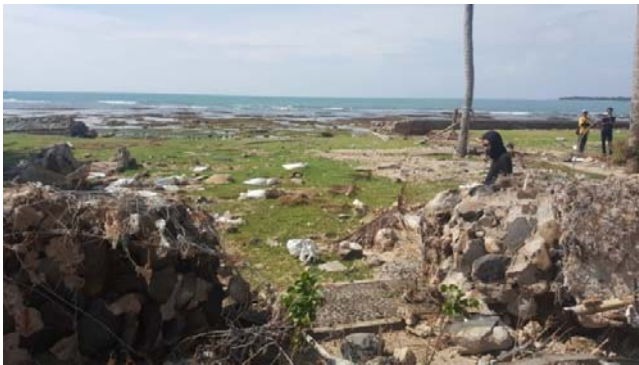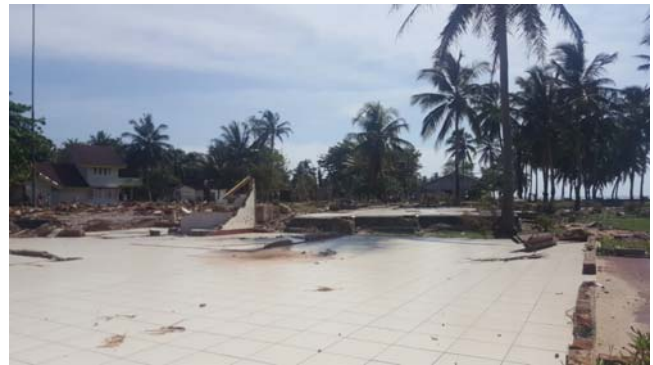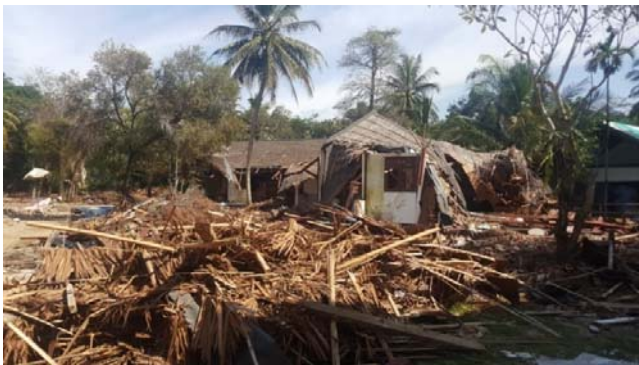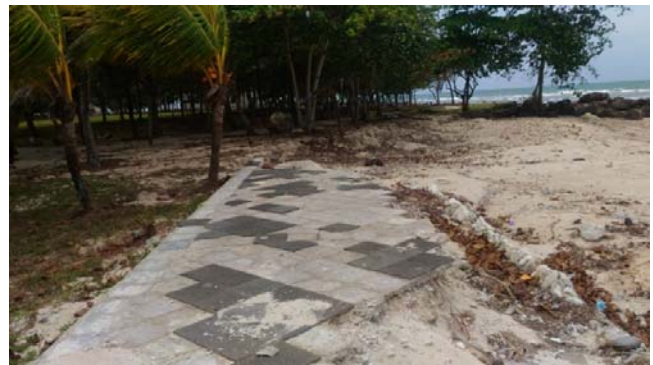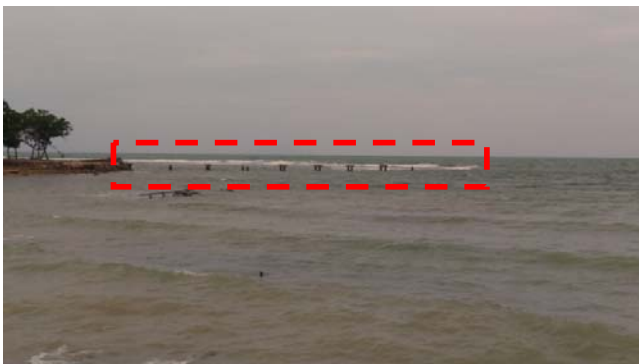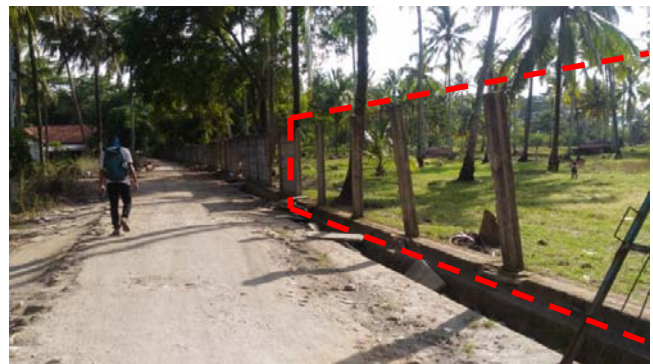



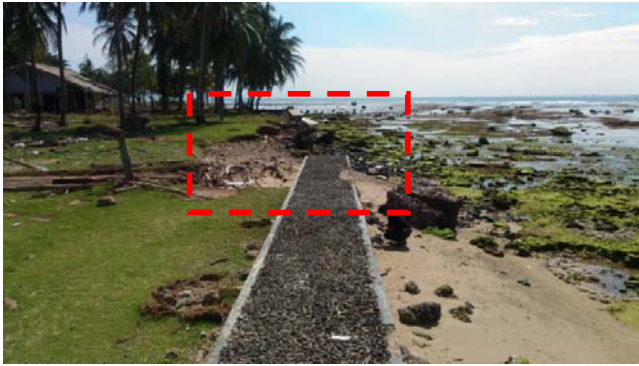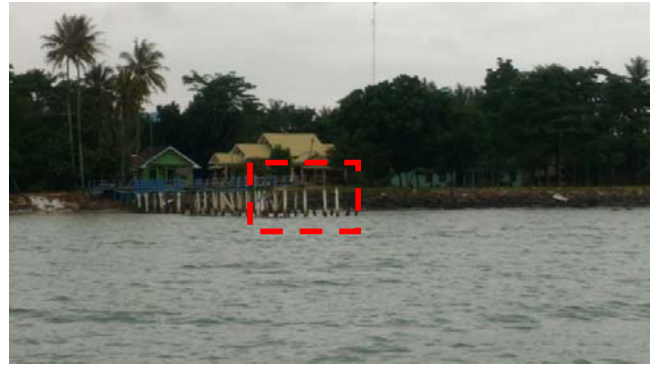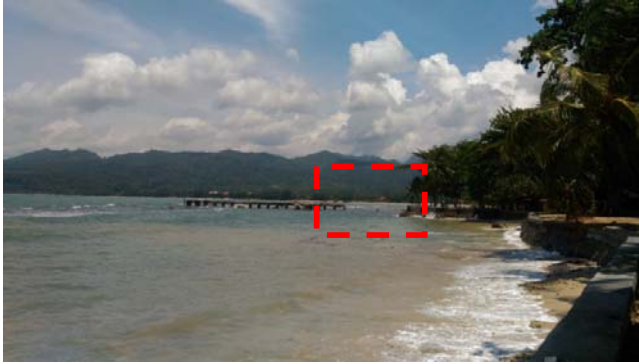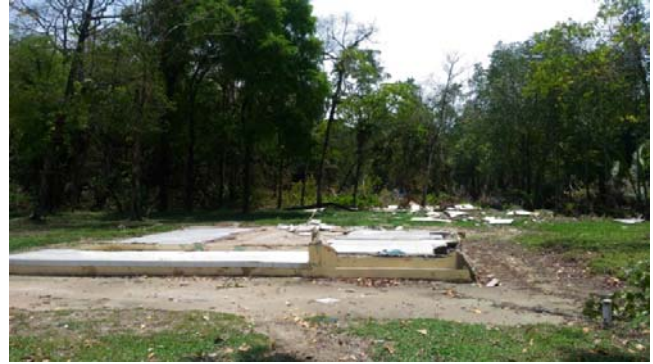

## Tsunami direction evidences

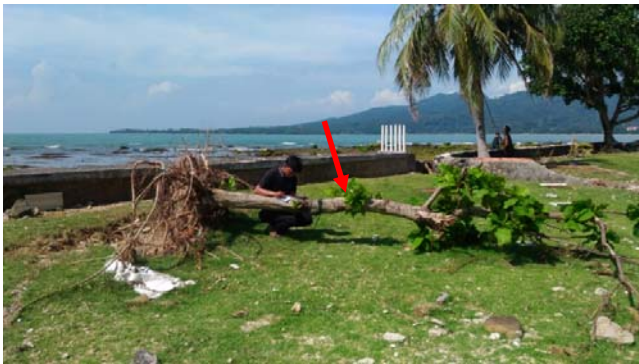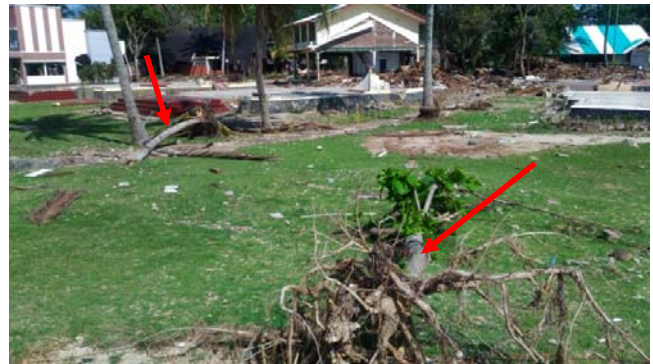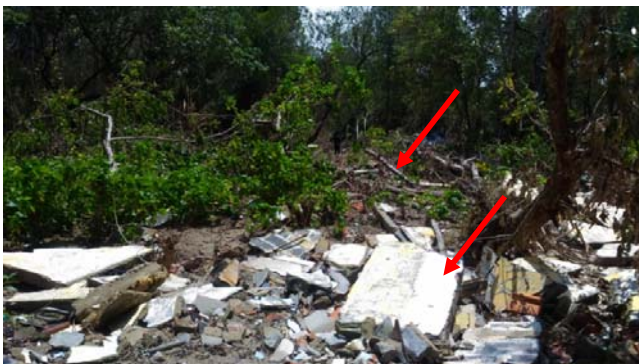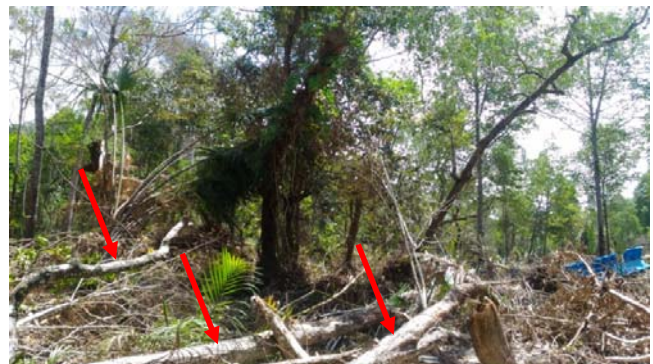



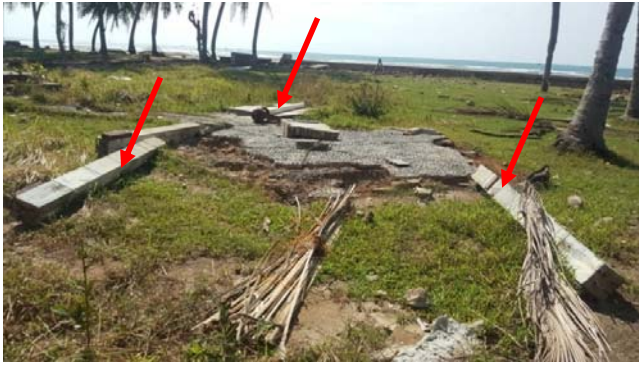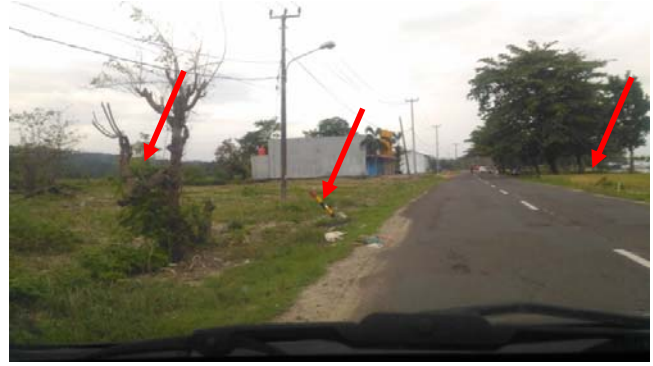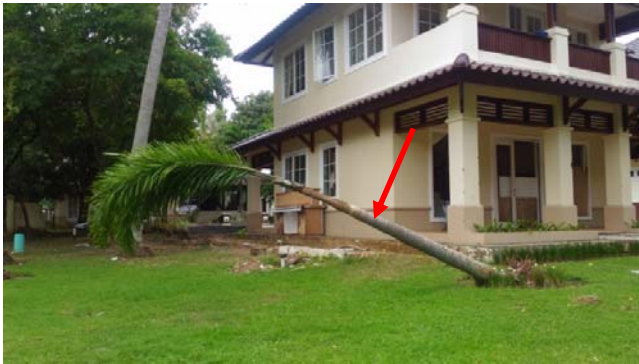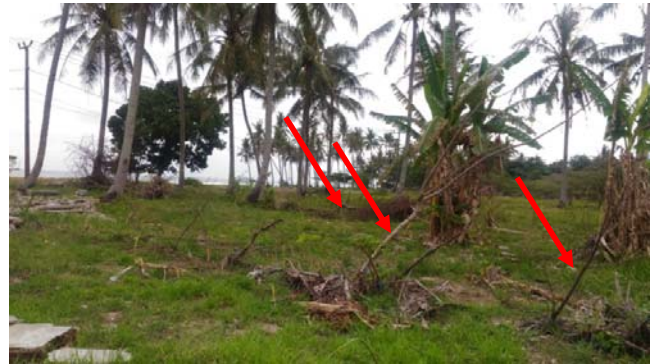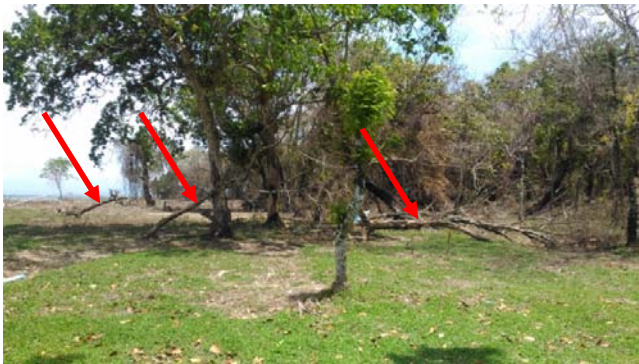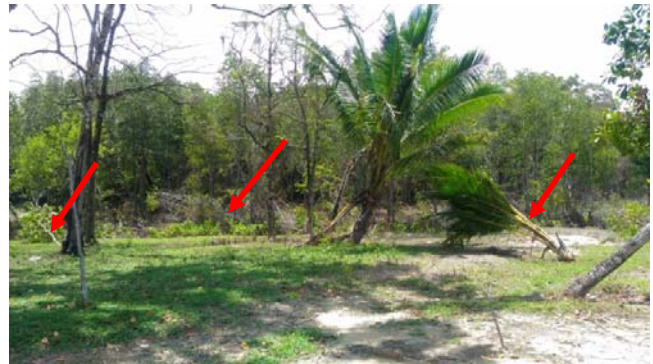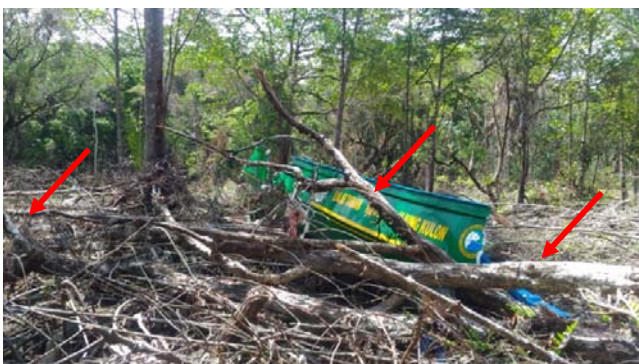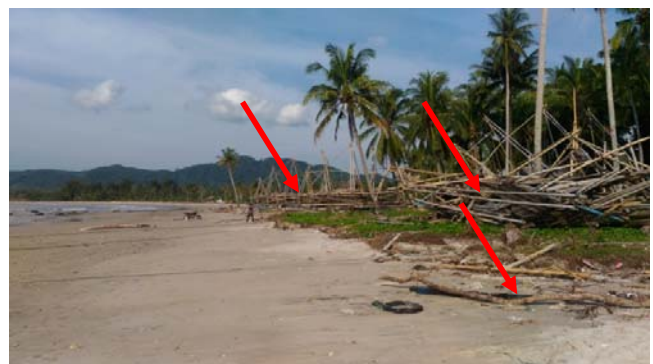



Flow depth and flash evidences (with additional information from eyewitnesses)

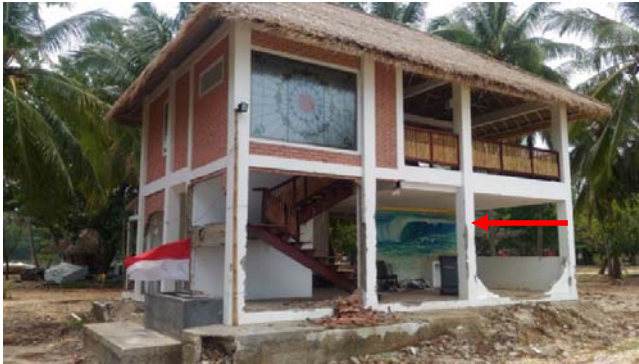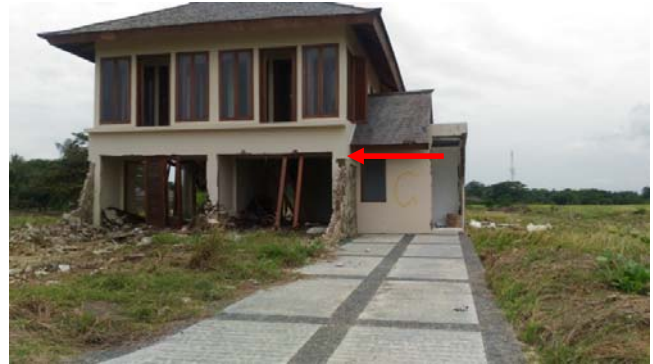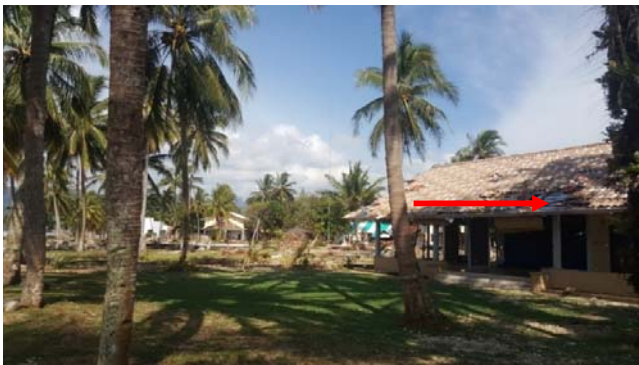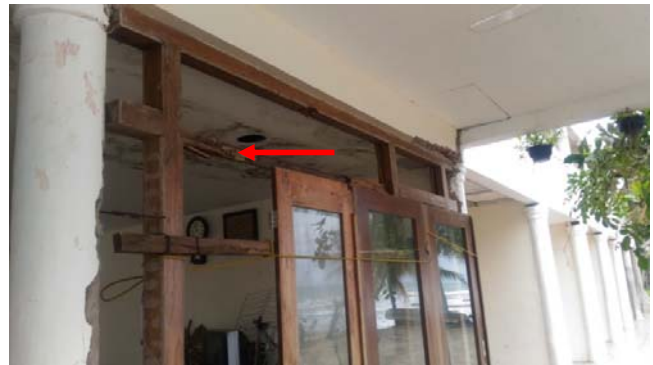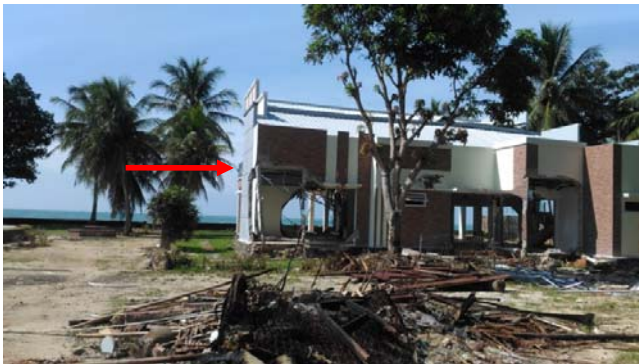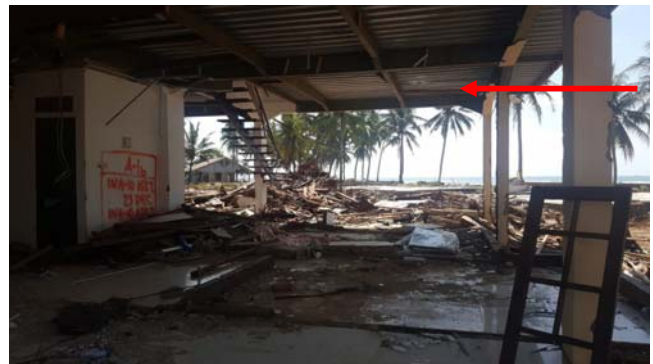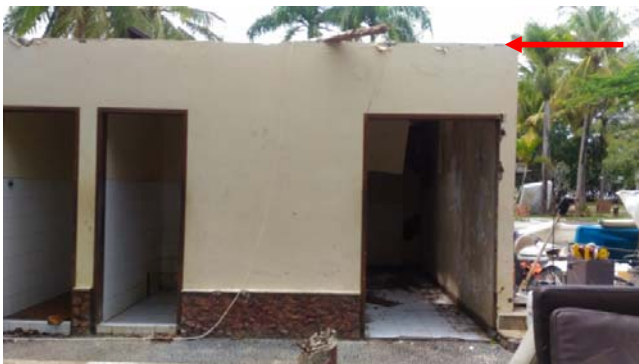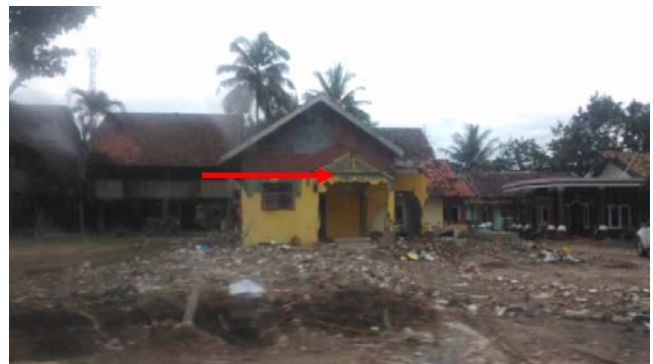



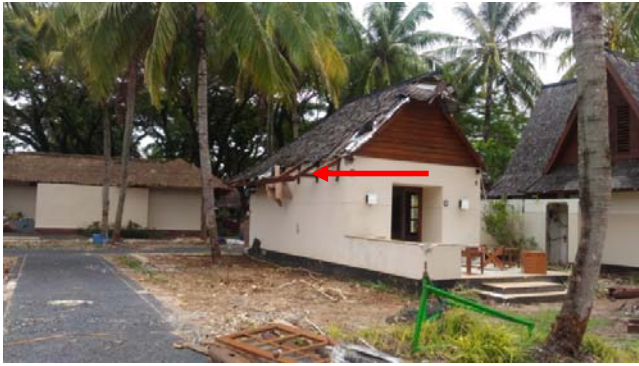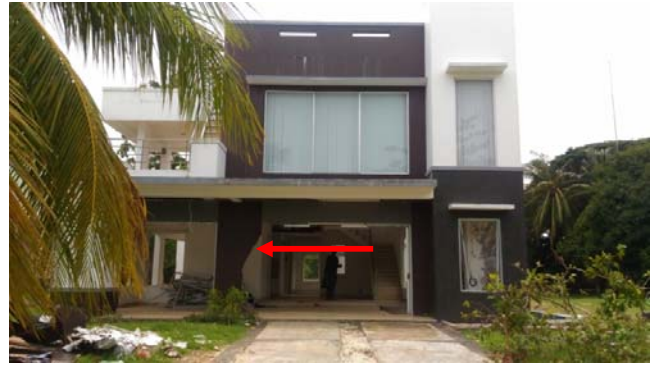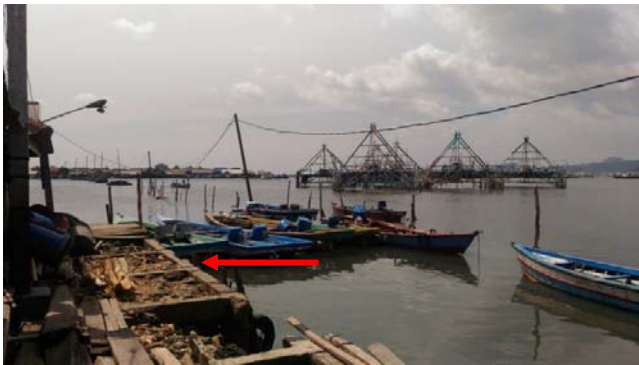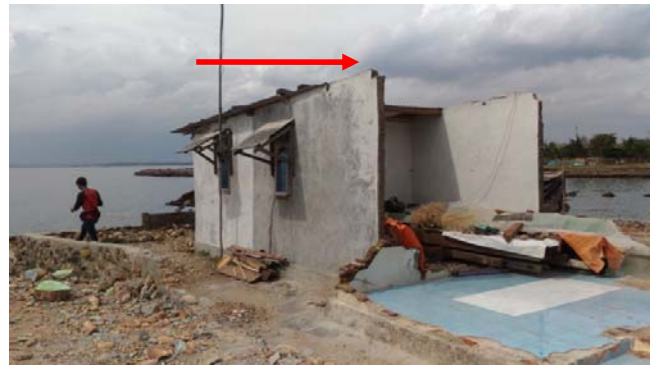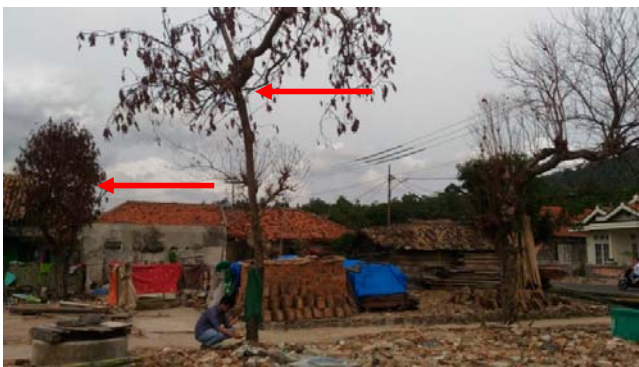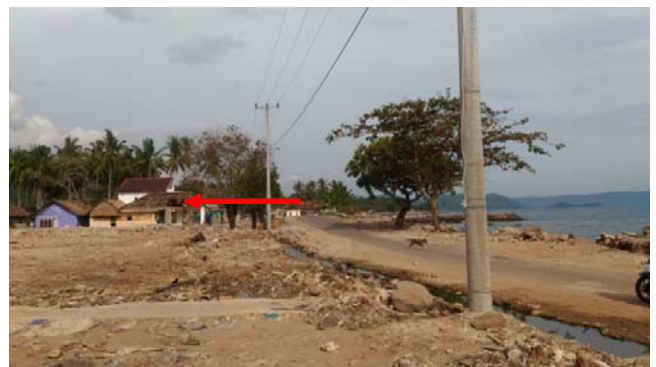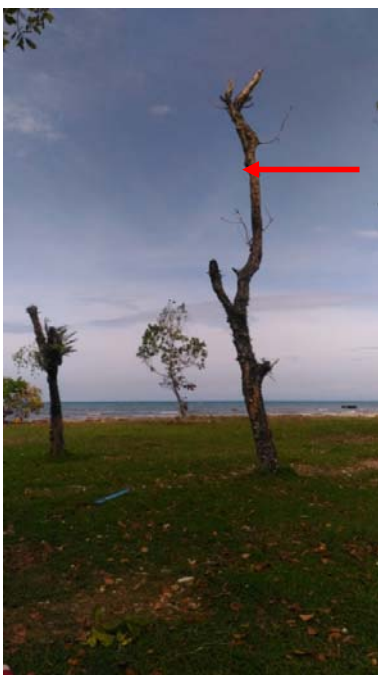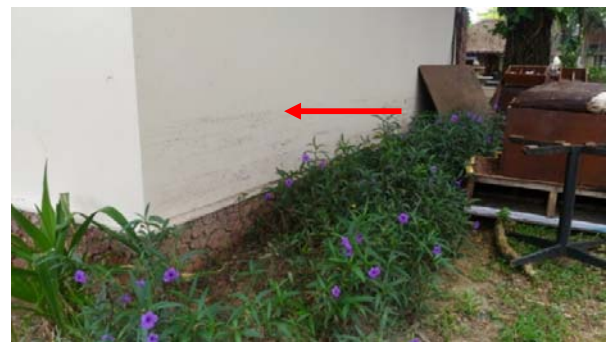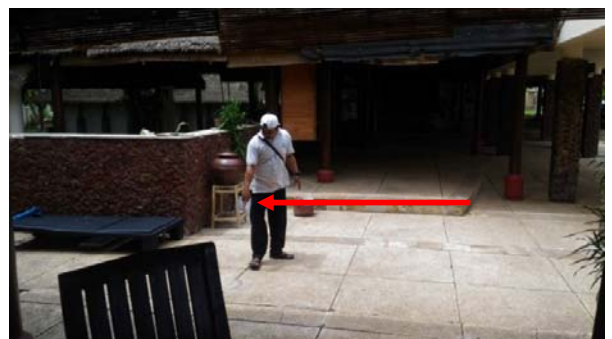



## Interview with eyewitnesses

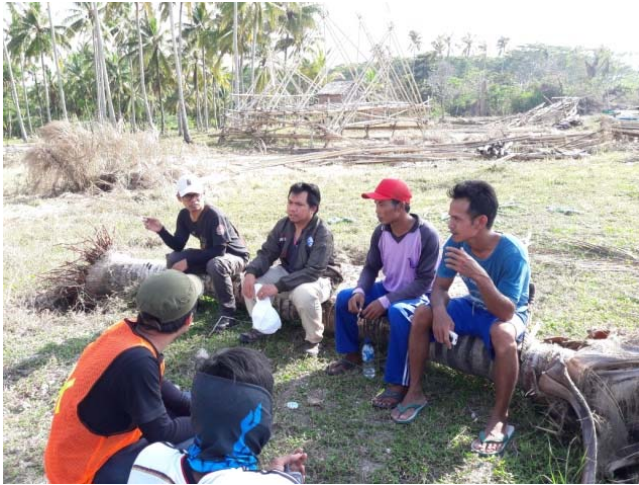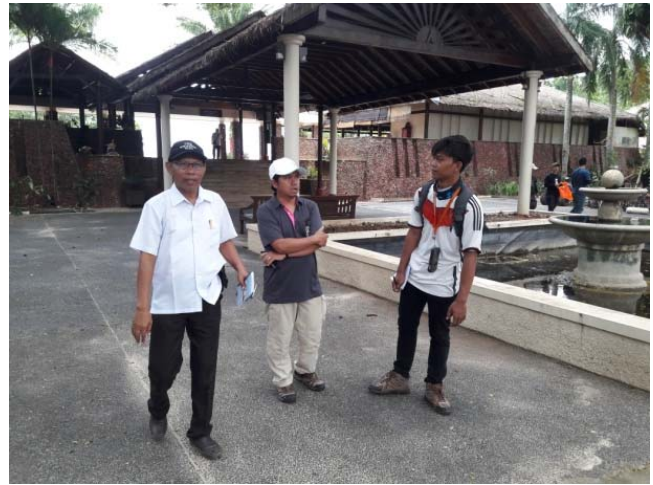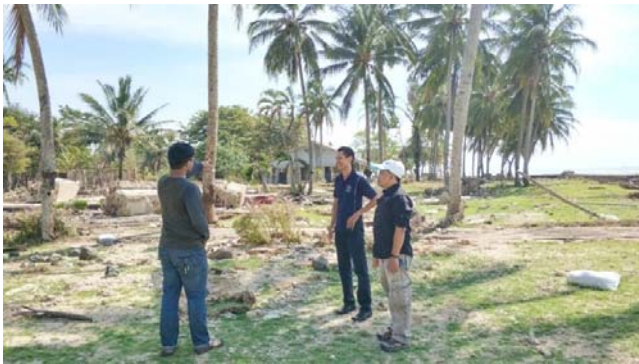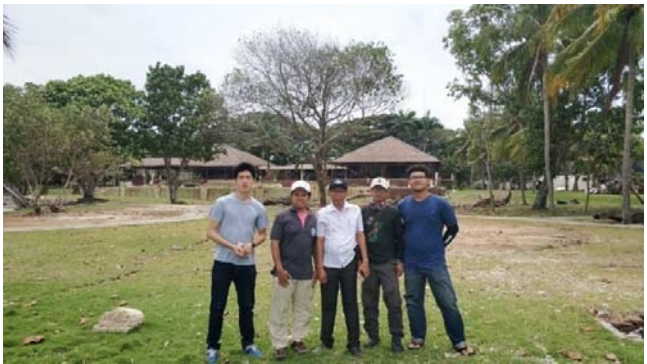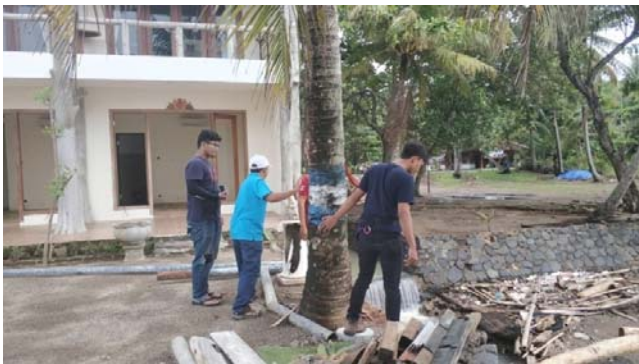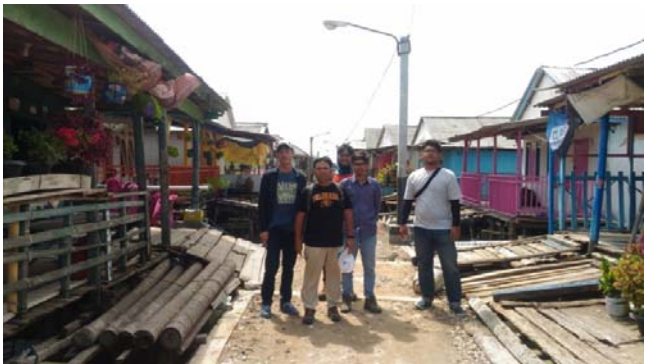

Supplement: Supplementary file 1 [file nhess-2019-325-supplement.pdf]
